# Supplementary material for: Color-resolved mechanoluminescence of Eu and Mn co-doped SrMg2(PO4)2
Source: Royal Society of Chemistry journal article supplement (doi:10.1039/d4ce00070f), 2024-01-01
Supplement: d4ce00070f1.pdf [file d4ce00070f1.pdf]

## Support information

### Color-Resolved Mechanoluminescence of Eu and Mn Co-doped

### $\text{SrMg}_2(\text{PO}_4)_2$

Qingshan He<sup>1</sup>, Yajing Yan<sup>2</sup>, Ting Wang<sup>3\*</sup>, Longchao Guo<sup>1</sup>, Yang Yue<sup>1</sup>, Nannan Zhu<sup>1</sup>,  
Weifang Bu<sup>1</sup>, Xin An<sup>1</sup>, Bosong Duan<sup>1</sup>, Xuanyu Zhu<sup>3</sup>, Xue Yu<sup>1\*</sup>

<sup>1</sup> School of Mechanical Engineering, Chengdu University, Chengdu 610106, China

<sup>3</sup> College of Materials and Chemistry & Chemical Engineering, Chengdu University of  
Technology, Chengdu 610059, China

<sup>1\*</sup> E-mail: [yuyu6593@126.com](mailto:yuyu6593@126.com)

<sup>3\*</sup> E-mail: [wangtkm@foxmail.com](mailto:wangtkm@foxmail.com)

## **Experimental section:**

**Sample preparation:** SrMg<sub>2</sub>(PO<sub>4</sub>)<sub>2</sub>: Eu<sup>2+</sup>, SrMg<sub>2</sub>(PO<sub>4</sub>)<sub>2</sub>: Mn<sup>2+</sup>, SrMg<sub>2</sub>(PO<sub>4</sub>)<sub>2</sub>: Eu<sup>2+</sup>, Mn<sup>2+</sup> phosphors were prepared by using a solid-state reaction method. The raw materials include SrCO<sub>3</sub> (99.99%, Macklin Biochemical Co. Ltd.), Mg(OH)<sub>2</sub>·4MgCO<sub>3</sub>·5H<sub>2</sub>O (99.99%, Macklin Biochemical Co. Ltd.), (NH<sub>4</sub>)<sub>2</sub>HPO<sub>4</sub> (99.99%, Macklin Biochemical Co. Ltd.), MnCO<sub>3</sub> (99.99%, Macklin Biochemical Co. Ltd.), Eu<sub>2</sub>O<sub>3</sub> (99.99%, Macklin Biochemical Co. Ltd.). For a typical synthesis procedure, the stoichiometric weighted raw materials were homogeneously mixed with ethyl alcohol with a complete ground process and the corresponding obtained mixtures were sintered at 1100 °C for 8 h under a reductive atmosphere (5% H<sub>2</sub> + 95% N<sub>2</sub>). Then, the sintered samples were naturally cooled down to room temperature and subsequently ground into powders for the following characterizations.

**Preparation of ML film:** Polydimethylsiloxane (PDMS, Sylgard 184, Dow Corning) was used to fabricate the elastic matrix to provide interior stress for ML phosphors. First, 2 g of PDMS base resin and 0.9 g of ML powder was mixed in a paper cup. After stirring for 5 min, the mixtures were poured into a 6x1.5 mm mold. After curing at 65 °C for 2 h, PDMS-based ML films were obtained.

**Characteristics:** The XRD data were collected in the range of 10° to 80° by a D8ADVANCE/Germany Bruker X-ray diffractometer with Cu K $\alpha$  Radiation ( $\lambda = 0.154056$  nm) at a 0.02° scanning step and 0.2 s time interval. The XPS were recorded by using Japan PHI5000 Versaprobe III. The photoluminescence excitation (PLE) and PL spectra were recorded by a Hitachi F-7000 fluorescence spectrophotometer. The ML spectra were tested by ocean optics QE pro optical fiber spectrometer. The morphology of the as-obtained sample was investigated by a scanning electron microscope (SEM, JIB-4700). Temperature-dependent fluorescent spectra were recorded in the range of 298–650 K by a Hitachi F-4600 fluorescence spectrophotometer coupled with a temperature controller (TAP-02, Tianjin Orient-KOJI Instrument).

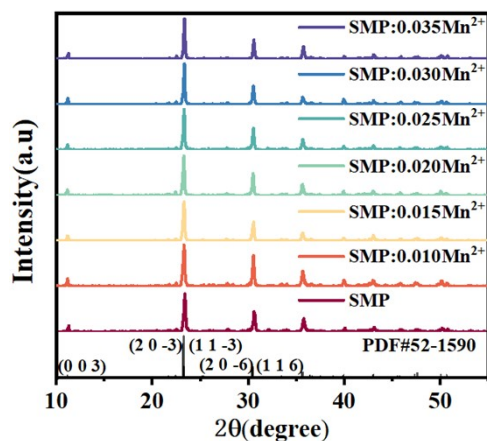

Figure S1. XRD patterns of SMP:  $x\text{Mn}^{2+}$  ( $x=0.010, 0.015, 0.020, 0.025, 0.030,$  and  $0.035$ ) samples.

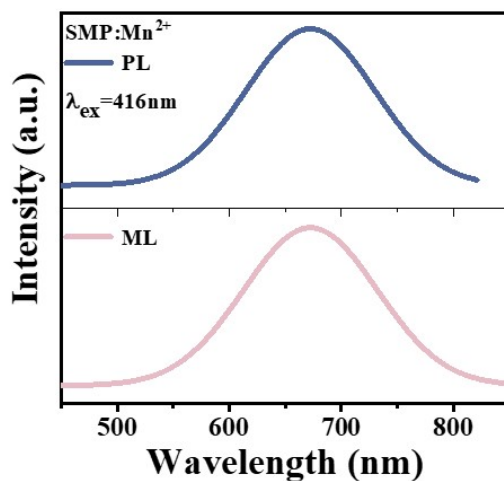

Figure S2. PL and ML spectra of SMP:  $\text{Mn}^{2+}$  phosphor.

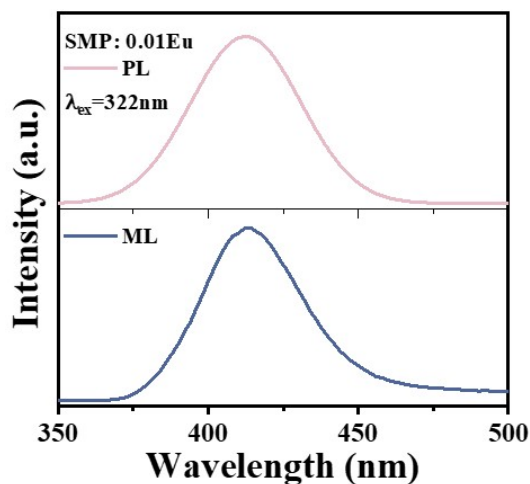

Figure S3. PL and ML spectra of SMP:  $0.01\text{Eu}^{2+}$  phosphor.
